# Supplementary material for: Carcinogenicity evaluation for the application of carbon nanotubes as biomaterials in rasH2 mice
Source: PubMed Central journal article supplement — Sci Rep. 2012 Jul 9;2:498. doi: 10.1038/srep00498 (PMC3391660; doi:10.1038/srep00498), 2012-07-09
Supplement: srep00498-s1.pdf [file srep00498-s1.pdf]

## Supplementary information

### Carcinogenicity evaluation for the application of carbon nanotubes as biomaterials in rasH2 mice

Seiji Takanashi<sup>1,#</sup>, Kazuo Hara<sup>1,#</sup>, Kaoru Aoki<sup>1</sup>, Yuki Usui<sup>2</sup>, Masayuki Shimizu<sup>1</sup>, Hisao Haniu<sup>1</sup>, Nobuhide Ogihara<sup>1</sup>, Norio Ishigaki<sup>1</sup>, Koichi Nakamura<sup>1</sup>, Masanori Okamoto<sup>1</sup>, Shinsuke Kobayashi<sup>1</sup>, Hiroyuki Kato<sup>1</sup>, Kenji Sano<sup>3</sup>, Naoyuki Nishimura<sup>4</sup>, Hideki Tsutsumi<sup>5</sup>, Kazuhiko Machida<sup>5</sup> & Naoto Saito<sup>6,\*</sup>

<sup>1</sup>Department of Orthopaedic Surgery, Shinshu University School of Medicine, Asahi 3-1-1, Matsumoto, Nagano 390-8621, Japan, <sup>2</sup>Department of Research Center for Exotic Nanocarbons, Shinshu University School of Engineering, Wakasato 4-17-1, Nagano, Nagano 380-8553, Japan, <sup>3</sup>Department of Laboratory Medicine, Shinshu University Hospital, Asahi 3-1-1, Matsumoto, Nagano 390-8621, Japan, <sup>4</sup>R & D Center, Nakashima Medical Co. Ltd., Haga 5322, Kita-ku, Okayama 701-1221, Japan, <sup>5</sup>Testing Department, Central Institute for Experimental Animals, Tonomachi 3-25-12, Kawasaki-ku, Kawasaki, Kanagawa 210-0821, Japan, <sup>6</sup>Department of Applied Physical Therapy, Shinshu University School of Health Sciences, Asahi 3-1-1, Matsumoto, Nagano 390-8621, Japan.

# These authors contributed equally to this work.

Correspondence and requests for materials should be addressed to N.S.

(saitoko@shinshu-u.ac.jp)

## **Figure legends**

### **Supplementary Fig. S1**

Component of tattoo ink used as reference material was carbon black. (a) SEM image of tattoo ink: uniform particles with diameters of about 40 nm were observed. Scale bar: 100 nm. (b) Raman spectroscopy of tattoo ink and carbon black: tattoo ink showed a Raman shift similar to that of carbon black. D band: defect-induced mode; G band: E<sub>2g2</sub> graphite mode. (c) TEM image of tattoo ink and carbon black: Similar particles were observed. Scale bar: 100 nm

Reproduced from reference 35 Hara, K. et al. Evaluation of CNT toxicity in comparison to tattoo ink nanoparticles for use as a biomaterial. *Mater Today* 14, 434-440, 2011, with permission.

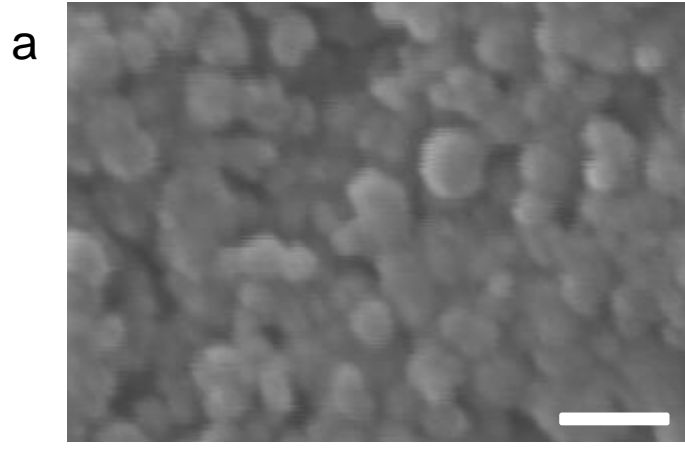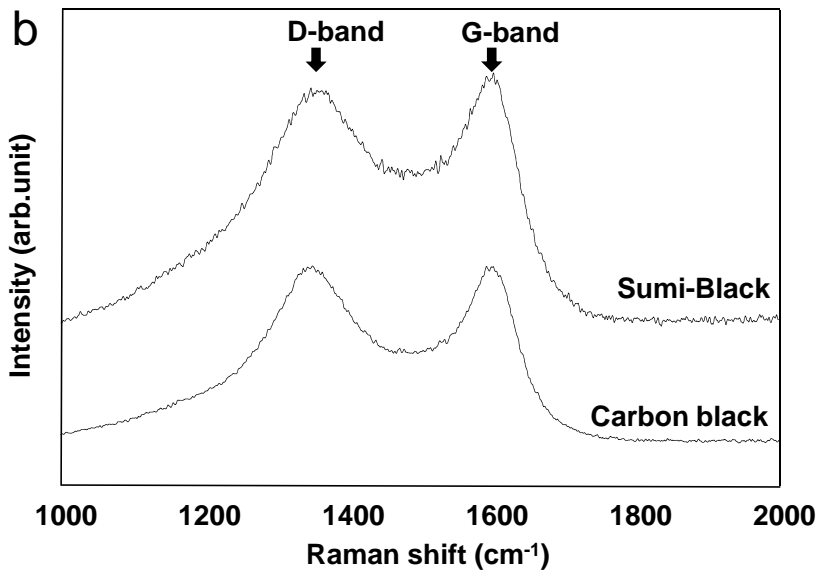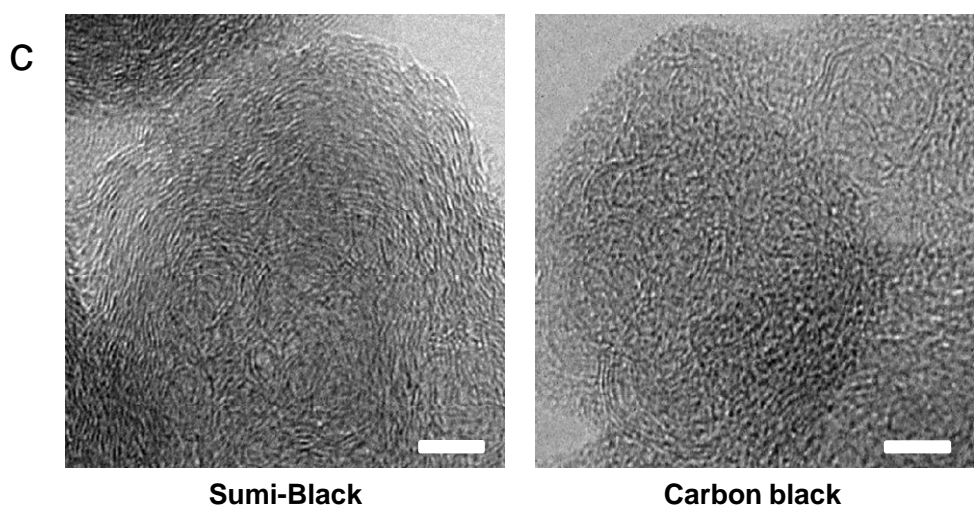

**Supplementary Fig. S1**
